# Supplementary material for: Peptidomics as a Tool to Assess the Cleavage of Wine Haze Proteins by Peptidases from Drosophila suzukii Larvae
Source: MDPI journal article supplement (doi:10.3390/biom13030451), 2023-02-28
Supplement: s1 [file s1]

## Supplementary Information

### Peptidomics as a tool to assess the cleavage of wine haze proteins by peptidases from *Drosophila suzukii* larvae

#### Authors

Wendell Albuquerque<sup>1</sup>, Parviz Ghezellou<sup>2</sup>, Kwang-Zin Lee<sup>3</sup>, Quintus Schneider<sup>1</sup>, Phillip Gross<sup>1</sup>, Tobias Kessel<sup>3</sup>, Bodunrin Omokungbe<sup>3</sup>, Bernhard Spengler<sup>2</sup>, Andreas Vilcinskas<sup>3,4</sup>, Holger Zorn<sup>1,3</sup>, Martin Gand<sup>1\*</sup>

#### Affiliations

<sup>1</sup>Institute of Food Chemistry and Food Biotechnology, Justus Liebig University Giessen, Heinrich-Buff-Ring 17, 35392 Giessen, Germany

<sup>2</sup>Institute of Inorganic and Analytical Chemistry, Justus Liebig University Giessen, Heinrich-Buff-Ring 17, 35392 Giessen, Germany

<sup>3</sup>Fraunhofer Institute for Molecular Biology and Applied Ecology, Ohlebergsweg 12, 35392 Giessen, Germany

<sup>4</sup>Institute for Insect Biotechnology, Justus Liebig University Giessen, Heinrich-Buff-Ring 26-32, 35392 Giessen, Germany

\*Corresponding author, E-Mail: [Martin.Gand@lcb.chemie.uni-giessen.de](mailto:Martin.Gand@lcb.chemie.uni-giessen.de), ORC-ID: 0000-0001-8211-691X

**Supplementary Table S1:** Peptide sequences for rTLP and rCHI identified by top-down peptidomics following incubation with peptidases from *Drosophila suzukii* larvae at pH 3.5.

| Protein     | Peptide                    |
|-------------|----------------------------|
| <b>rTLP</b> | NVNAGTTGGRVW               |
|             |                            |
| <b>rCHI</b> | YSGFGNDGSTDANKREIAA        |
|             | SGFGNDGSTDANKREIAAF        |
|             | NSYSGFGNDGSTDANKREIAAF     |
|             | SGFGNDGSTDANKREIAA         |
|             | NSYSGFGNDGSTDANKREIAA      |
|             | YSGFGNDGSTDANKREIAAF       |
|             | SALNSYSGFGNDGSTDANKREIAA   |
|             | LSALNSYSGFGNDGSTDANKREIAA  |
|             | WMNNVHSVIGQ                |
|             | DVVTSEKTA                  |
|             | NVHSVIGQGFGATIR            |
|             | LSALNSYSGFGNDGSTDANKREIAAF |
|             | DVVTSEKTA                  |
|             | GFGATIRAING                |
|             | WMNNVHSVIGQGFGA            |
|             | YTRAAF                     |
|             | RVQYYKDY                   |
|             | WMNNVHSVIGQGF              |
|             | GATIRAING                  |
|             | TDVVTSEKTA                 |
|             | NKREIAAF                   |
|             | NYGAAGNSIGFNGLSNPGIVAT     |
|             | FAHVTHETGHF                |
|             | IEEINGASHN                 |
|             | TIRAINGA                   |
|             | NYGAAGNSIGFNG              |
|             | WMNNVHSVIGQGFGATIR         |
|             | IEEINGASHNY                |
|             | SALNSYSGFGNDGSTDANKREIAAF  |
|             | FYTRAAF                    |
|             | FFDGIINQ                   |
|             | SVIGQGFGATIRAINGA          |
|             | NVHSVIGQGF                 |
|             | NYGAAGNSIGFNGLSNPGIVA      |
|             | NVHSVIGQ                   |
|             | GFGATIRAINGA               |
|             | FDGIINQ                    |

|  |                    |
|--|--------------------|
|  | VVTSFKTAL          |
|  | NVHSVIGQGFGA       |
|  | DVVTSFKT           |
|  | VVTSFKTALW         |
|  | FKTALWF            |
|  | WFWMNNVH           |
|  | NVHSVIGQFGGATIRAIN |
|  |                    |

1 MAARKLLTVLL VGALFGAAVA QNCGCASGLC CSKYGYCOTG SDYCGDGCQS GPCDSSSSGG SSVSDIVTQS FFDGIINQAA SSCAGKNFYT RAAFLSALNS YSGFGNDGST DANKREIAAF FARVTHETGH

131 FCYIEEINGA SHNYCDSSNT QYPCVSGQNY YGRGFLQLTW NYNYGAAGNS IGFNLGNPG IVATDVVTSE KTALNFWGN VHVGQGGG ATIRAINGAV ECNGGNTAAV NRVQYYKDY CSQLGVSPGD

261 NLTC

**Supplementary Figure S1:** Peptide products from the cleavage of rCHI (UniProt ID: QX7AU6) following incubation with peptidases from *D. suzukii* larvae. The highlighted amino acid sequences (blue underlined) were identified by *de novo* sequencing and database comparison using Peaks Studio v.X+.

```
1  ATFNIQNHCS YTVWAAAVPG GGMQLGSGQS WSLNVNAGTT GGRVWARTNC NFDASGNGKC ETGDCGGLLQ CTAYGTPPNT LAEFALNQFS NLDFFDISLV
101 DGFNVPMAPN PTSNGCTRGI SCTADIVGEC PAALKTTGGC NNPCTVFKTD EYCCNSGSCS ATDYSRFFKT RCPDAYSYPK DDQTSTFTCT AGTNYEVVFC
201 P
```

**Supplementary Figure S2:** Peptide products from the cleavage of rTLP (PDB ID: 4JRU) following incubation with peptidases from *D. suzukii* larvae. The highlighted amino acid sequences (blue underlined) were identified by *de novo* sequencing and database comparison using Peaks Studio v. X+.
